# Supplementary material for: Cu/Cu2O/NH2-MIL-88B (Fe) heterojunction as the photocatalyst to remove hexavalent chromium heavy metal ions in water
Source: Royal Society of Chemistry journal article supplement (doi:10.1039/d4ra08143a), 2025-01-01

**Cu/Cu<sub>2</sub>O/NH<sub>2</sub>-MIL-88B (Fe) heterojunction as the photocatalyst to  
remove hexavalent chromium heavy metal ions in water**

## Chemicals

2-aminoterephthalic acid (NH<sub>2</sub>-BDC), ferric chloride hexahydrate (FeCl<sub>3</sub>·6H<sub>2</sub>O), Copper nitrate (Cu(NO<sub>3</sub>)<sub>2</sub>), potassium dichromate (K<sub>2</sub>Cr<sub>2</sub>O<sub>7</sub>), diphenylcarbazide (DPC), N,N-dimethylformamide (DMF), ethanol (CH<sub>3</sub>CH<sub>2</sub>OH), and methanol (CH<sub>3</sub>OH), hydrochloric acid (HCl) were supplied by Sinopharm Chemical Reagents Limited Company and used as original form without further purification.

## **Characterization**

The X-ray diffraction (XRD, Germany) was recorded with a LabX-6000 X-ray diffractometer. The infrared spectra were obtained by Nicolets50 Fourier transform infrared spectrometer (FT-IR, America). The morphology and microstructure of the samples were analyzed via a scanning electron microscope (SEM, S-4800, Japan) and energy dispersive X-ray (EDX) spectrometer. Also, it was characterized by a transmission electron microscope (TEM) and a high-resolution TEM (HR-TEM) using a JEM2100 transmission electron microscope (TEM, JEOL) operating at 200 kV. The N<sub>2</sub> adsorption-desorption isotherm and Brunauer-Emmett-Teller (BET, America) method were used to test the porous nature and surface area with Autosorb-IQ-XR. The X-ray photoelectron spectroscopy measurements were investigated, using an ESCALAB250 X-ray electron spectrometer with Al K $\alpha$  (1486.6 eV) and Mg K $\alpha$  (1253.6 eV) (XPS, America). The UV-vis absorption spectra of samples were recorded by the Lambda35 UV-visible spectrophotometer (DRS, America). The photocatalytic experiments were carried out under 300W Xe lamps (CeauLight CEL-S500) with a cutoff filter of 420nm.

### **Photocatalytic activity test**

At room temperature, 10 mg of catalyst was added to 50 mL of Cr(VI) ( $20 \text{ mg}\cdot\text{mL}^{-1}$ ) aqueous solution to study the photocatalytic activity, ethanol was added to the solution as hole trapping agent and the pH value was varied to 2 by adding HCl solution. The pH of the solution was adjusted to the desired value with diluted aqueous HCl and NaOH. Firstly, the mixed solution was stirred in the darkness. Take a certain amount of solution to centrifuge at regular intervals. The supernatant was filtered with a  $0.22 \mu\text{m}$  syringe filter to remove suspended catalyst particles. After a certain period, it is proved that adsorption-desorption equilibrium was reached when the concentration of Cr (VI) solution did not change with time in the darkness. Then, the suspension was irradiated with a 300w Xe lamp with a UV-cutoff filter ( $\lambda > 420\text{nm}$ ), and a certain amount of solution was taken at intervals for centrifugation, filtration, and detection. The filtered solution was measured with a UV-vis spectrophotometer for the absorbance of the DPC-Cr (VI) complex at 540 nm. At the same wavelength, the concentration of Cr (VI) was calculated according to Beer-Lambert Law. And the corresponding adsorption-reduction efficiency of Cr (VI) was calculated following the formula:

$$\text{Adsorption - reduction efficiency (\%)} = C/C_0 \times 100\%$$

Here, C: concentration of Cr (VI).  $C_0$ : initial concentration of Cr (VI). And the concentration of total Cr was determined by inductively coupled plasma (ICP).

Fig. S1 TEM and Mapping images of Cu/Cu<sub>2</sub>O/NH<sub>2</sub>-MIL-88B (Fe) (15 wt.%)

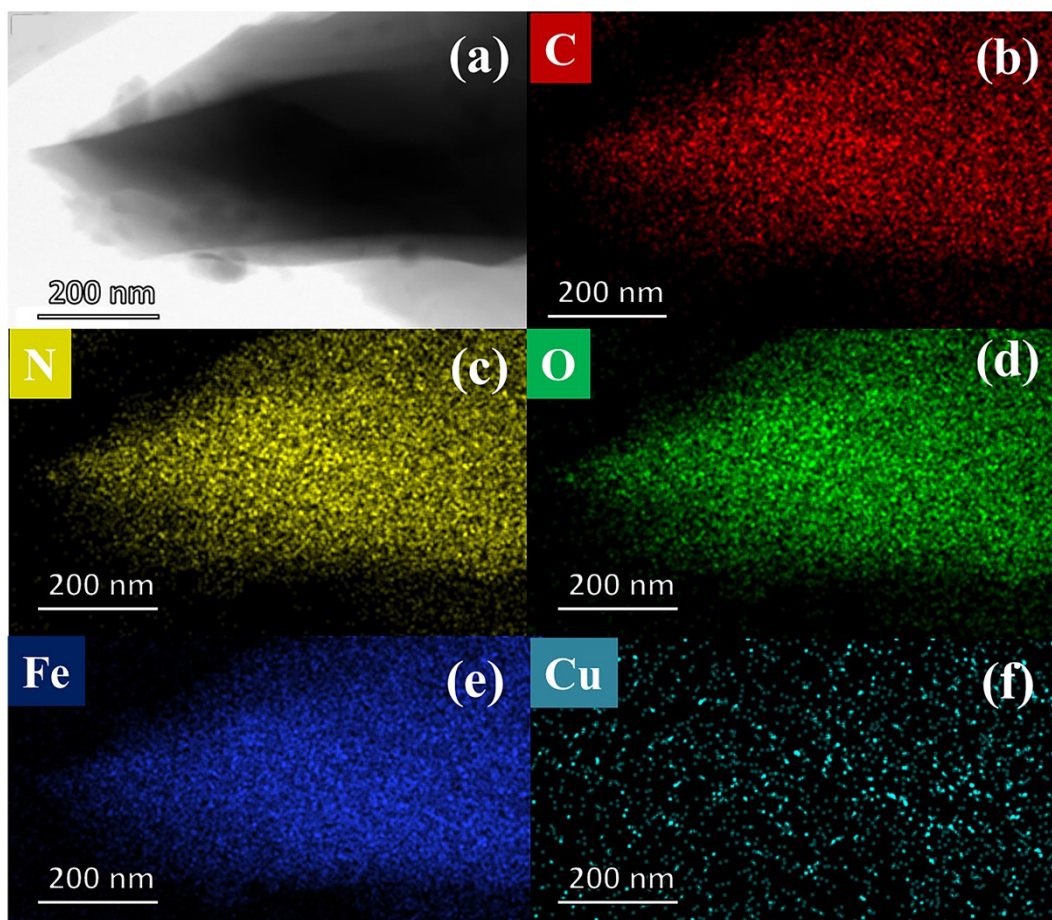

Tab. S1 BET table of Cu/Cu<sub>2</sub>O/NH<sub>2</sub>-MIL-88B (Fe) (15 wt.%) and NH<sub>2</sub>-MIL-88B (Fe)

| Samples                                                      | Surface area (m <sup>2</sup> ·g <sup>-1</sup> ) |
|--------------------------------------------------------------|-------------------------------------------------|
| NH <sub>2</sub> -MIL-88B (Fe)                                | 556.49                                          |
| Cu/Cu <sub>2</sub> O/NH <sub>2</sub> -MIL-88B (Fe) (15 wt.%) | 461.84                                          |

Fig. S2 XPS spectra of N 1s (a) and O 1s (b) of Cu/Cu<sub>2</sub>O/NH<sub>2</sub>-MIL-88B (Fe) (15 wt.%) samples

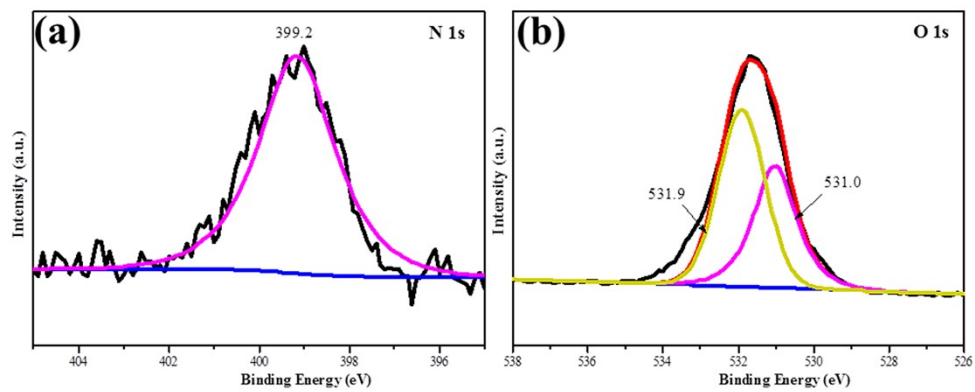

Fig. S3 XPS spectra of Fe 2p of Cu/Cu<sub>2</sub>O/NH<sub>2</sub>-MIL-88B (Fe) (15 wt.%) samples

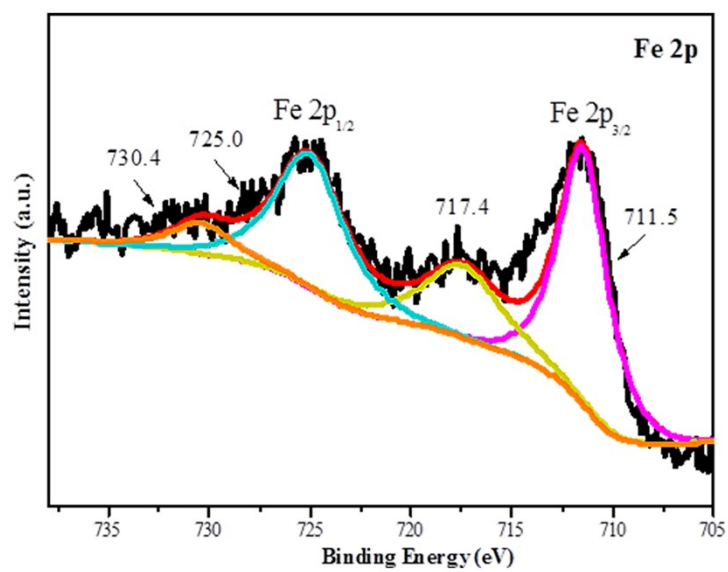



Fig. S4 XPS Valence band spectra of Cu/Cu<sub>2</sub>O/NH<sub>2</sub>-MIL-88B (Fe) (15 wt.%) samples

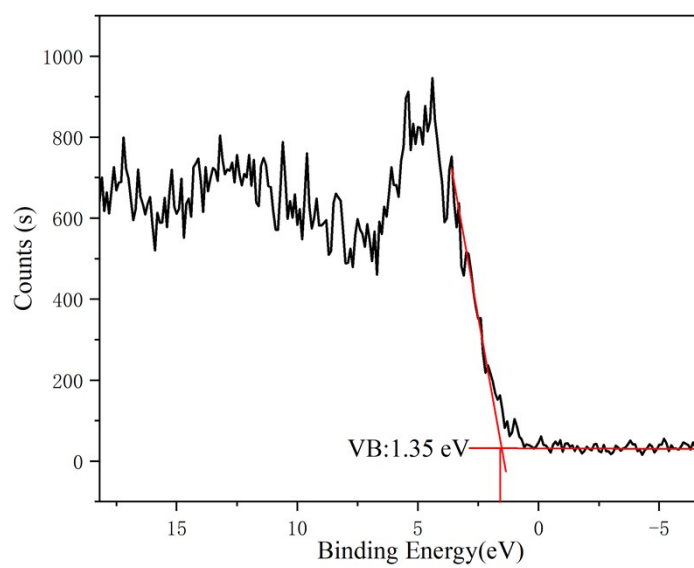

Tab. S2 Surface elemental and % distribution of Cu/Cu<sub>2</sub>O/NH<sub>2</sub>-MIL-88B (Fe) (15 wt.%) samples

| Element | Core level | Position (eV) | Elem. comp. (At %) | Elem.distribution (wt.%) |
|---------|------------|---------------|--------------------|--------------------------|
| C       | 1s         | 281.31        | 46.91              | 24.09                    |
| N       | 1s         | 395.97        | 4.66               | 2.79                     |
| O       | 1s         | 528.39        | 25.89              | 17.72                    |
| Fe      | 2p         | 708.30        | 18.49              | 44.31                    |
| Cu      | 2p         | 930.88        | 4.05               | 11.09                    |

Tab. S3 k and R<sup>2</sup> of photocatalytic reduction of Cr (VI) under different conditions

| Samples                                                      | k / min <sup>-1</sup> | R <sup>2</sup> |
|--------------------------------------------------------------|-----------------------|----------------|
| No Light                                                     | 0.00202               | 0.80261        |
| No Catalyst                                                  | -0.00018              | 0.94466        |
| NH <sub>2</sub> -MIL-88B (Fe)                                | 0.00675               | 0.99541        |
| Cu/Cu <sub>2</sub> O/NH <sub>2</sub> -MIL-88B (Fe) (15 wt.%) | 0.01863               | 0.98479        |

Fig. S5 XRD spectra (a) and FT-IR spectra (b) of Cu/Cu<sub>2</sub>O/NH<sub>2</sub>-MIL-88B (Fe) samples after experiment

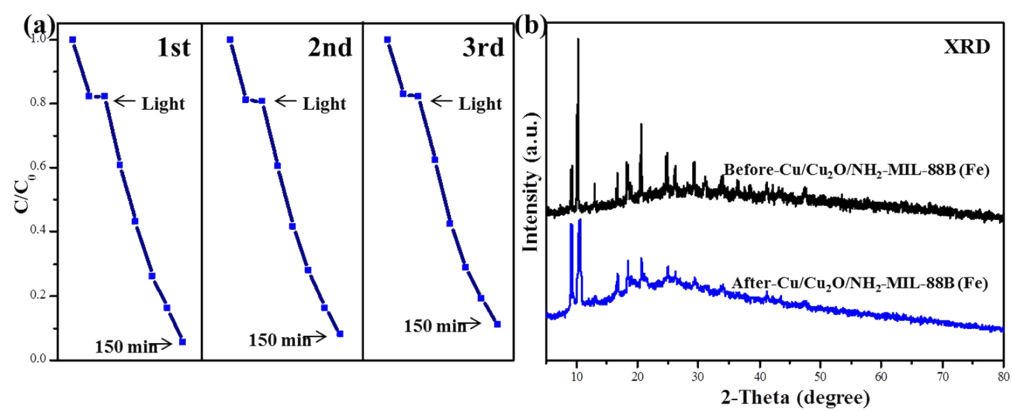

Fig. S6 Active species capture analysis

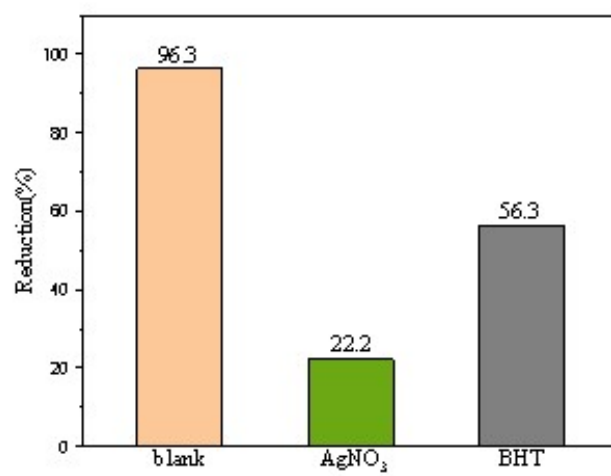

Supplement: d4ra08143a1.pdf [file d4ra08143a1.pdf]
